# Supplementary material for: Divergent Proteomic Responses Offer Insights Into Resistant Physiological Responses of a Reef-Foraminifera to Climate Change Scenarios
Source: Preprints.org preprint supplement (doi:10.20944/preprints202103.0100.v1), 2021-03-02
Supplement: Supplementary file 1 [file supplementary]

# Divergent proteomic responses offer insights into resistant physiological responses of a reef-foraminifera to climate change scenarios

Marleen Stuhr <sup>1,2,3,\*</sup>, Louise P. Cameron <sup>3,4</sup>, Bernhard Blank-Landeshammer <sup>5</sup>, Claire E. Reymond <sup>3</sup>, Steve S. Doo <sup>3</sup>, Hildegard Westphal <sup>3,6</sup>, Albert Sickmann <sup>5,7,8</sup> and Justin B. Ries <sup>4</sup>

<sup>1</sup> Interuniversity Institute for Marine Sciences, Eilat, Israel

<sup>2</sup> The Mina and Everard Goodman Faculty of Life Sciences, Bar-Ilan University, Ramat Gan, Israel

<sup>3</sup> Leibniz Centre for Tropical Marine Research (ZMT), Bremen, Germany

<sup>4</sup> Department of Marine and Environmental Sciences, Northeastern University, Boston, USA

<sup>5</sup> Leibniz Institut für Analytische Wissenschaften – ISAS – e.V., Dortmund, Germany

<sup>6</sup> Department of Geosciences, Bremen University, Bremen, Germany

<sup>7</sup> Medizinische Fakultät, Medizinische Proteom-Center (MPC), Ruhr-Universität Bochum, Germany

<sup>8</sup> Department of Chemistry, University of Aberdeen, Scotland, UK

## Supplementary Materials:

Figure S1: Phylogenetic assignment of photosymbionts

Figure S2: Heatmap of differentially abundant proteins per sample

Figure S3: Heatmap of differentially abundant proteins in photosymbionts

Figure S4: Heatmap of differentially abundant proteins of the host foraminifera

Figure S5: Principal component analysis of differentially abundant proteins in a) photosymbionts and b) foraminiferal host including GO term summaries

Figure S6: Principal component analysis of differentially abundant proteins in a) photosymbionts and b) foraminiferal host including protein descriptions

Figure S7: Number of up- and down-regulated proteins comparing all treatments

Figure S8: Bar plots showing the number of gene ontology term hits of (a)  $p\text{CO}_2$ - and (b) temperature-regulated proteins

Table S1: Additional data for mean chemical conditions

Table S2: Results of nominal logistic models for the frequencies of test breakage and mortality

Table S3: Kruskal-Wallis non-parametric results for DBL  $\Delta[\text{H}^+]$

Table S4: Results of two-factorial analysis of variance (ANOVA) of the measured physiological parameters

Table S7: Number of DAPs in between treatments

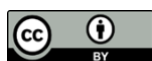

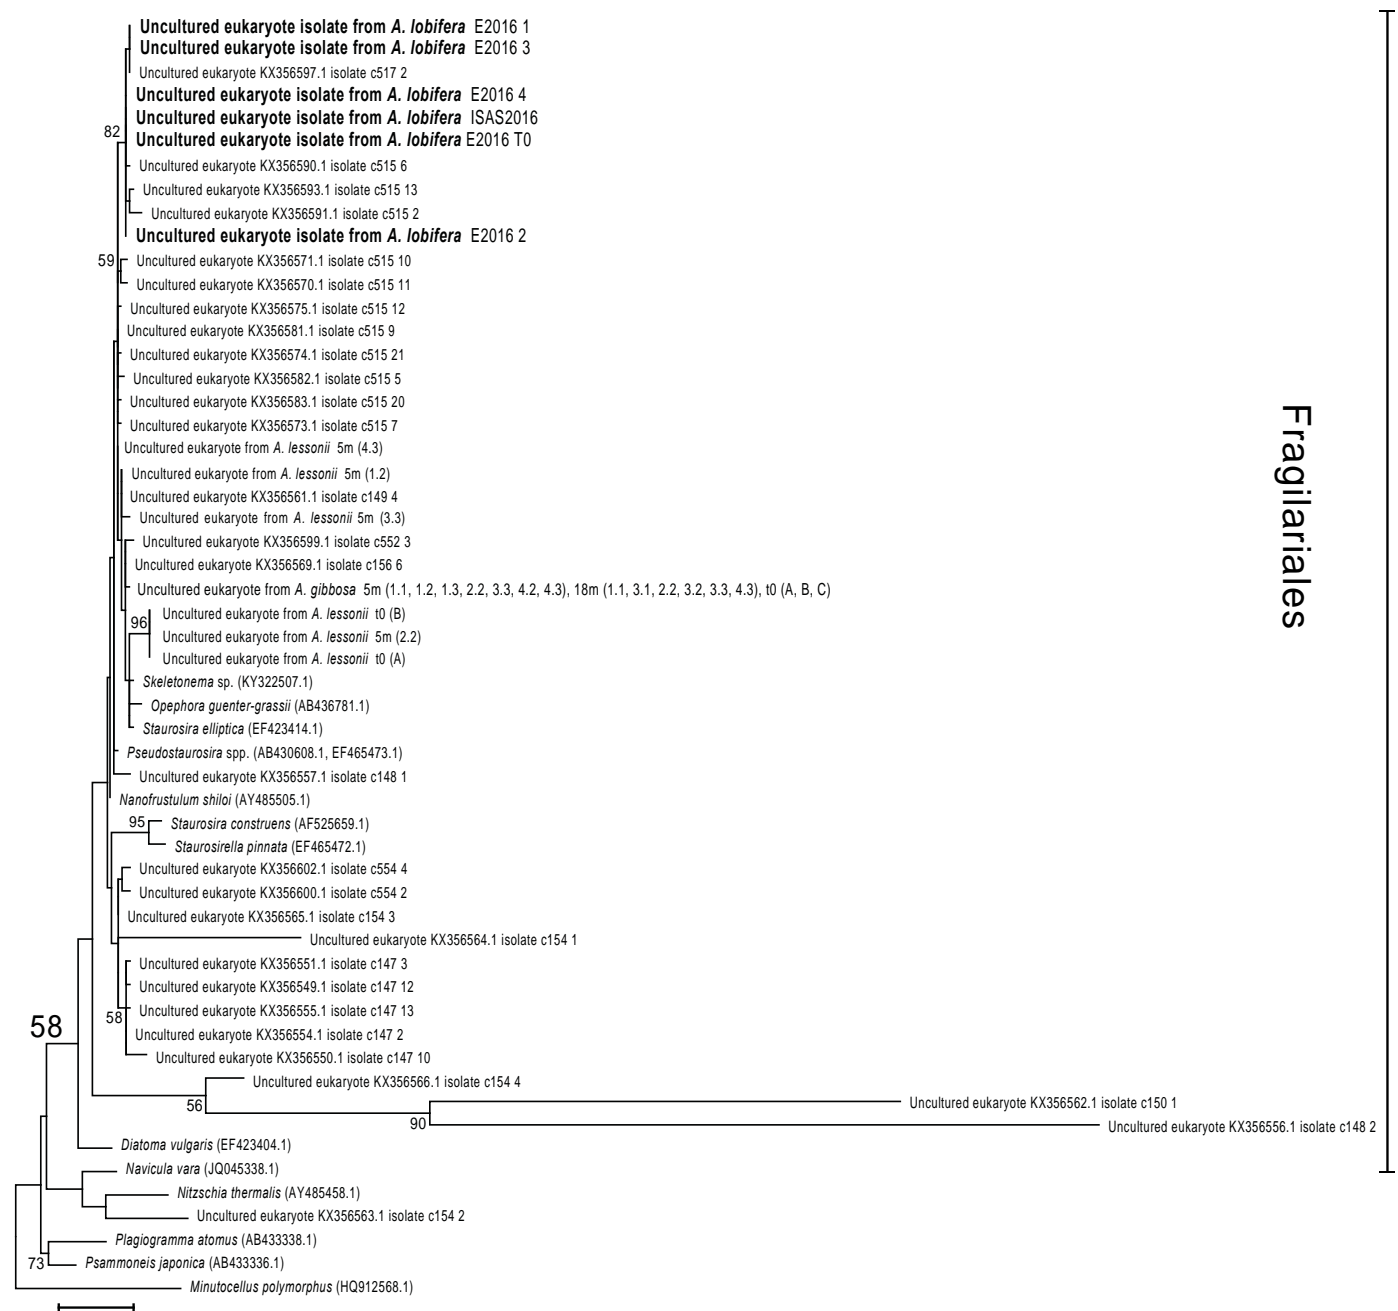

**Figure S1.** Phylogenetic assignment of photosymbionts from *Amphistegina lobifera* from the Red Sea, sampled at the Inter-University Institute (IUI) for Marine Sciences in Eilat, Israel, at about 3 m depth, as well as reference symbiont sequences from *A. lobifera* from Schmidt et al. (2016, labelled 'Uncultured eukaryote KX3565x'). Additionally, *A. gibbosa* and *A. lessonii* photosymbiont sequences from Stuhr et al. (2018) and sequences of diatoms formerly described from large benthic foraminifera together with the other closely related algae as identified by BLAST searches completed the dataset. Bootstrap support above 50% is given at the respective nodes of the maximum-likelihood tree. All recovered symbiont sequences were found within the Fragilariales with a bootstrap support of 58%.

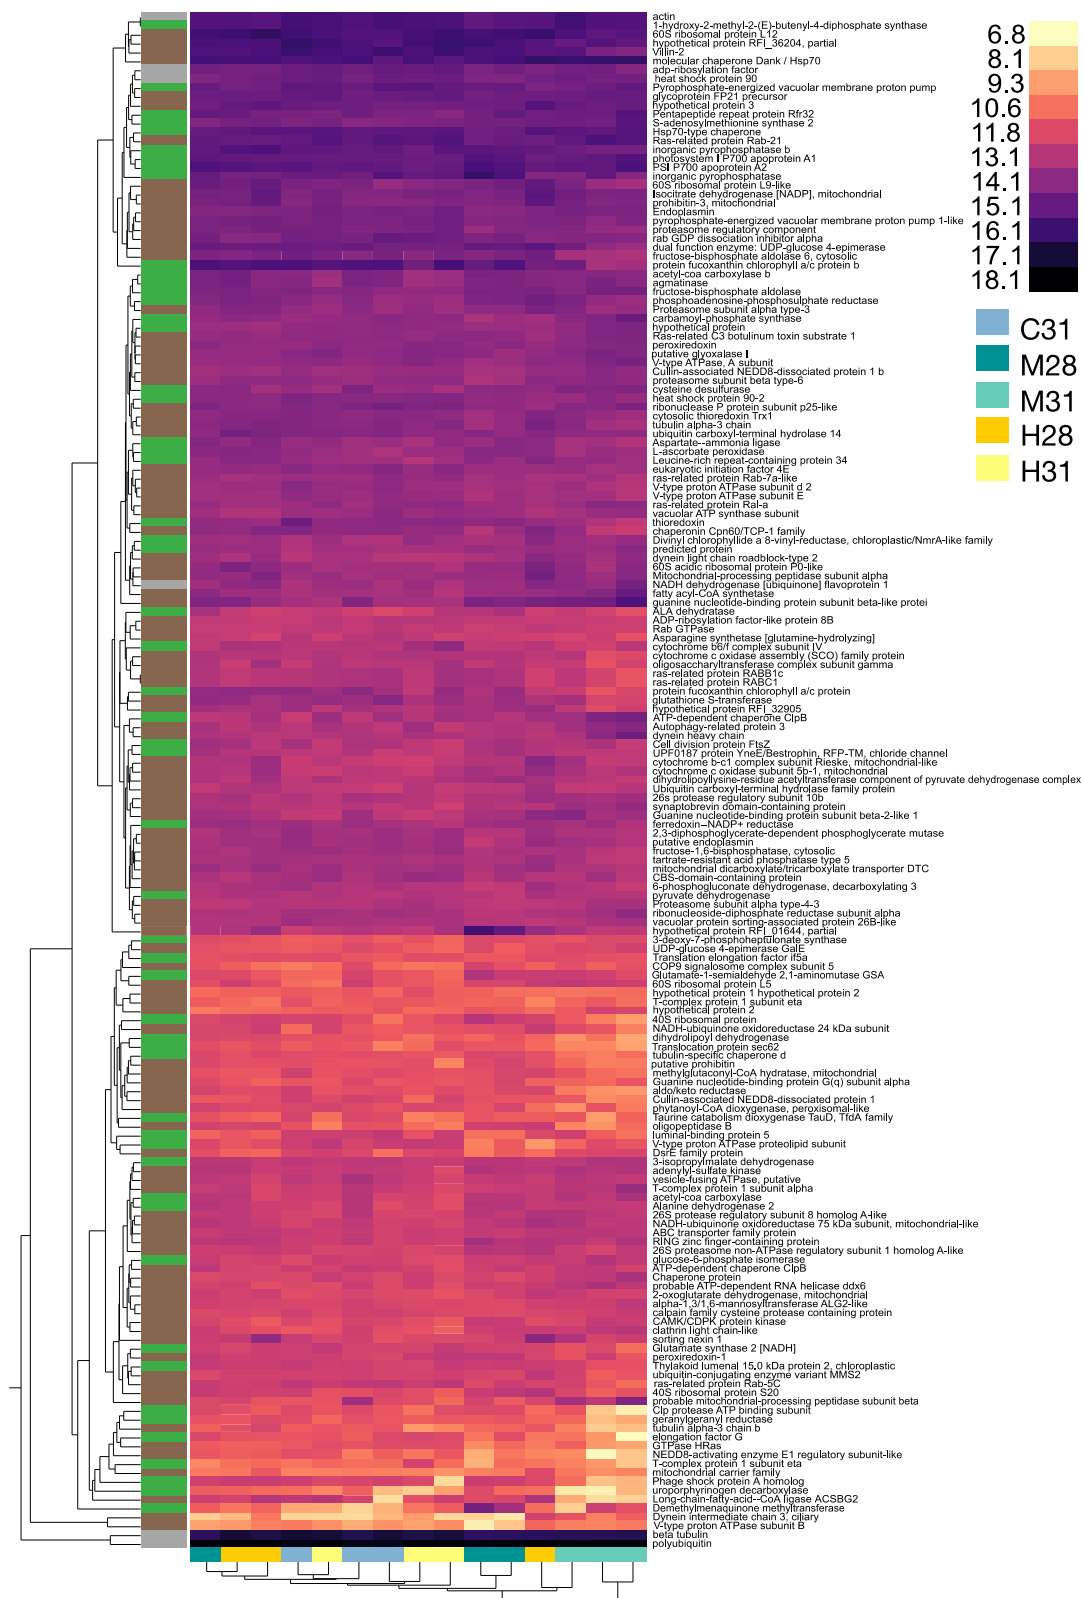

**Figure S2.** Heatmap of differentially abundant proteins in *Amphistegina lobifera* and their photosymbionts in response to treatments of elevated  $p\text{CO}_2$  (C = 492 ppm, M = 963 ppm, H = 3182 ppm) at 28°C or 31°C, where rows represent differentially abundant protein (n = 173) and columns represent biological replicates (n = 3 per treatment). Proteins and replicates are clustered using average linkage of log-transformed protein abundance values. Bars on the left show whether the protein was associated to: host = brown, photosymbionts = green, or both = grey.

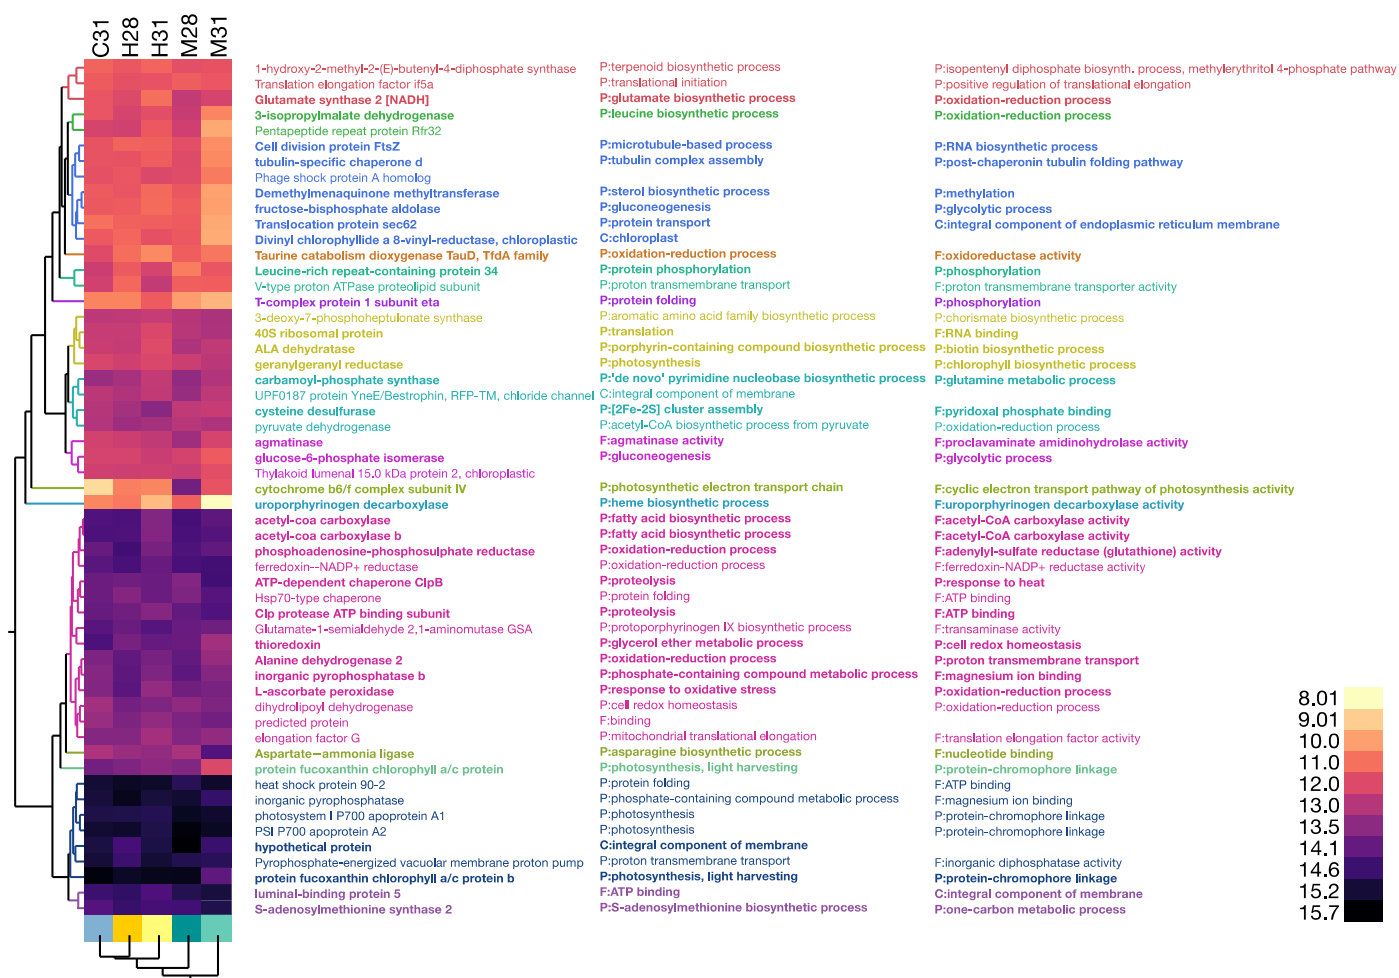

**Figure S3.** Heatmap of differentially abundant proteins in photosymbionts of *Amphistegina lobifera* in response to treatments of elevated  $p\text{CO}_2$  (C = 492 ppm, M = 963 ppm, H = 3182 ppm) at 28°C or 31°C, where rows represent differentially abundant proteins, for which the first two GO terms given. Average protein abundances were log-transformed and clustered using average linkage. Bold proteins were strongest regulated (GLM,  $q \leq 0.05$ , Tukeys'  $p \leq 0.05$ , and  $\log_2\text{FC} \geq |1|$ ).

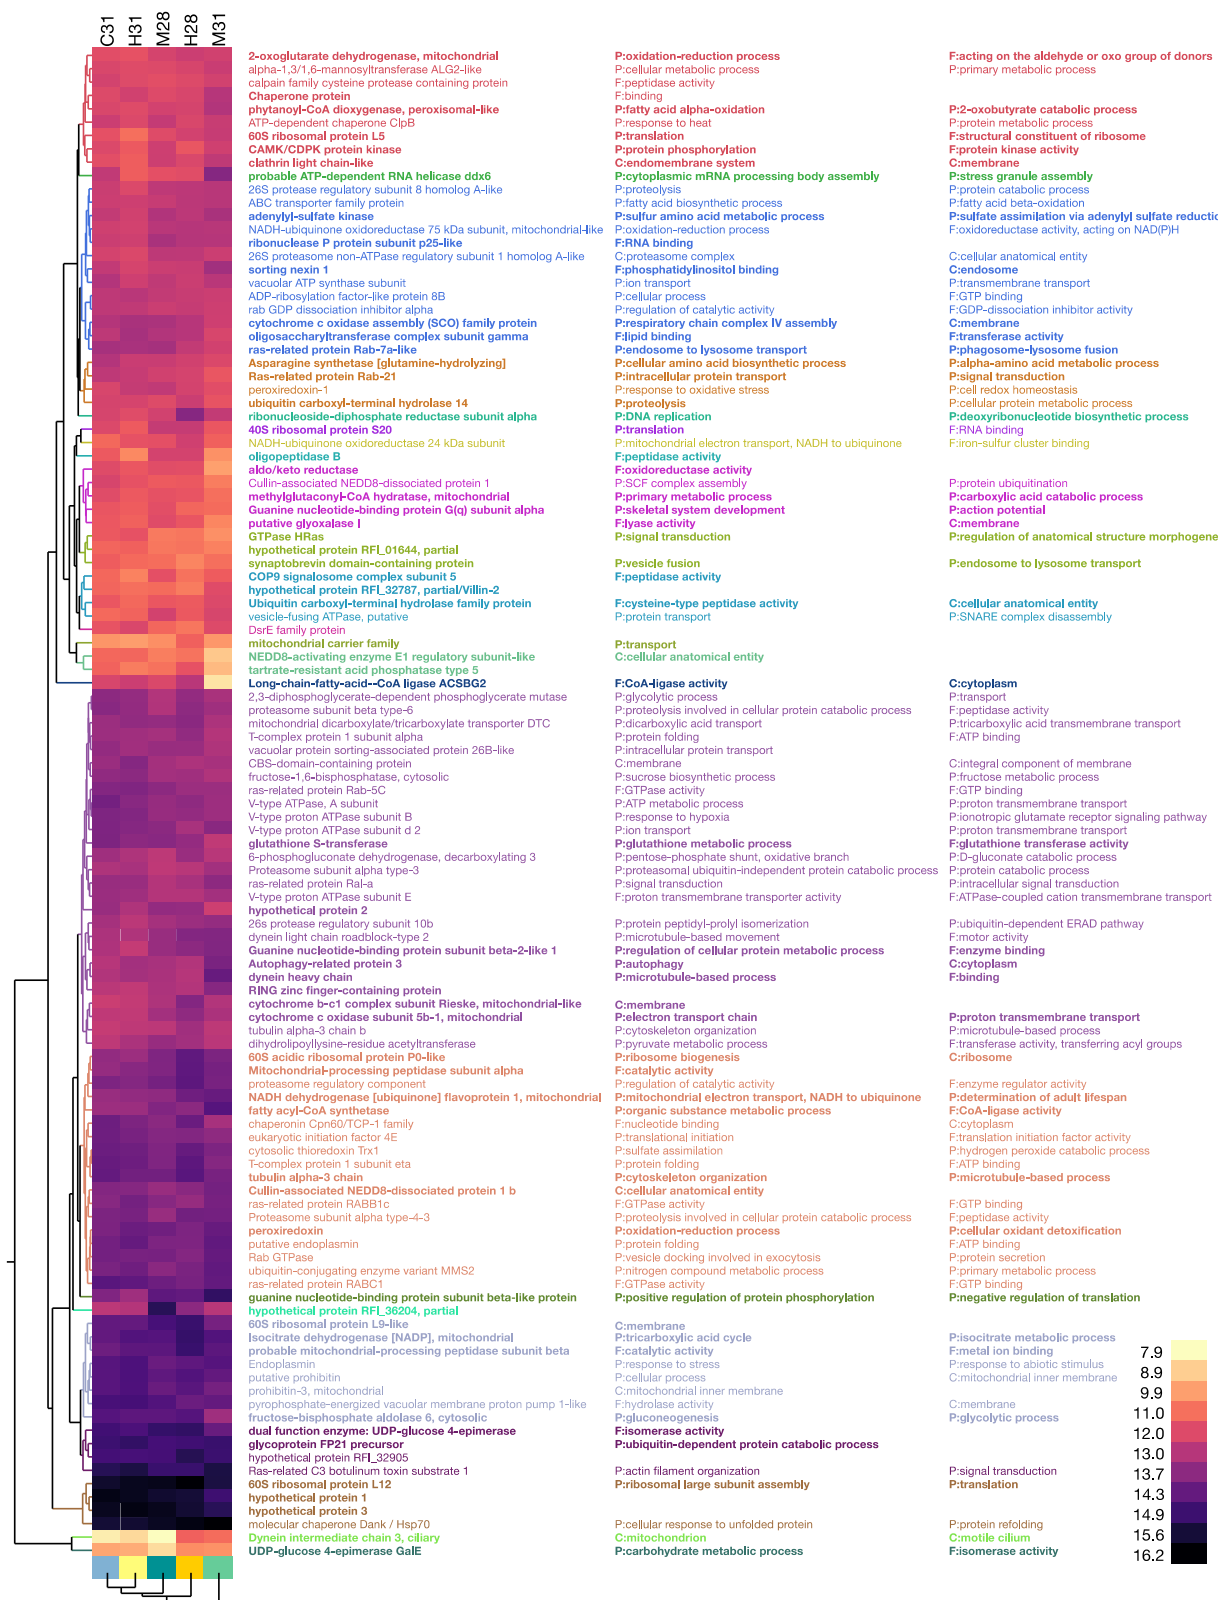

**Figure S4.** Heatmap of differentially abundant proteins of the host foraminifera *Amphistegina lobifera* in response to treatments of elevated  $p\text{CO}_2$  (C = 492 ppm, M = 963 ppm, H = 3182 ppm) at 28°C or 31°C, where rows represent differentially abundant proteins, for which the first two GO terms are given. Average protein abundances were log-transformed and clustered using average linkage. Bold proteins were strongest regulated (GLM,  $q \leq 0.05$ , Tukeys'  $p \leq 0.05$ , and  $\log_2\text{FC} \geq |1|$ ).

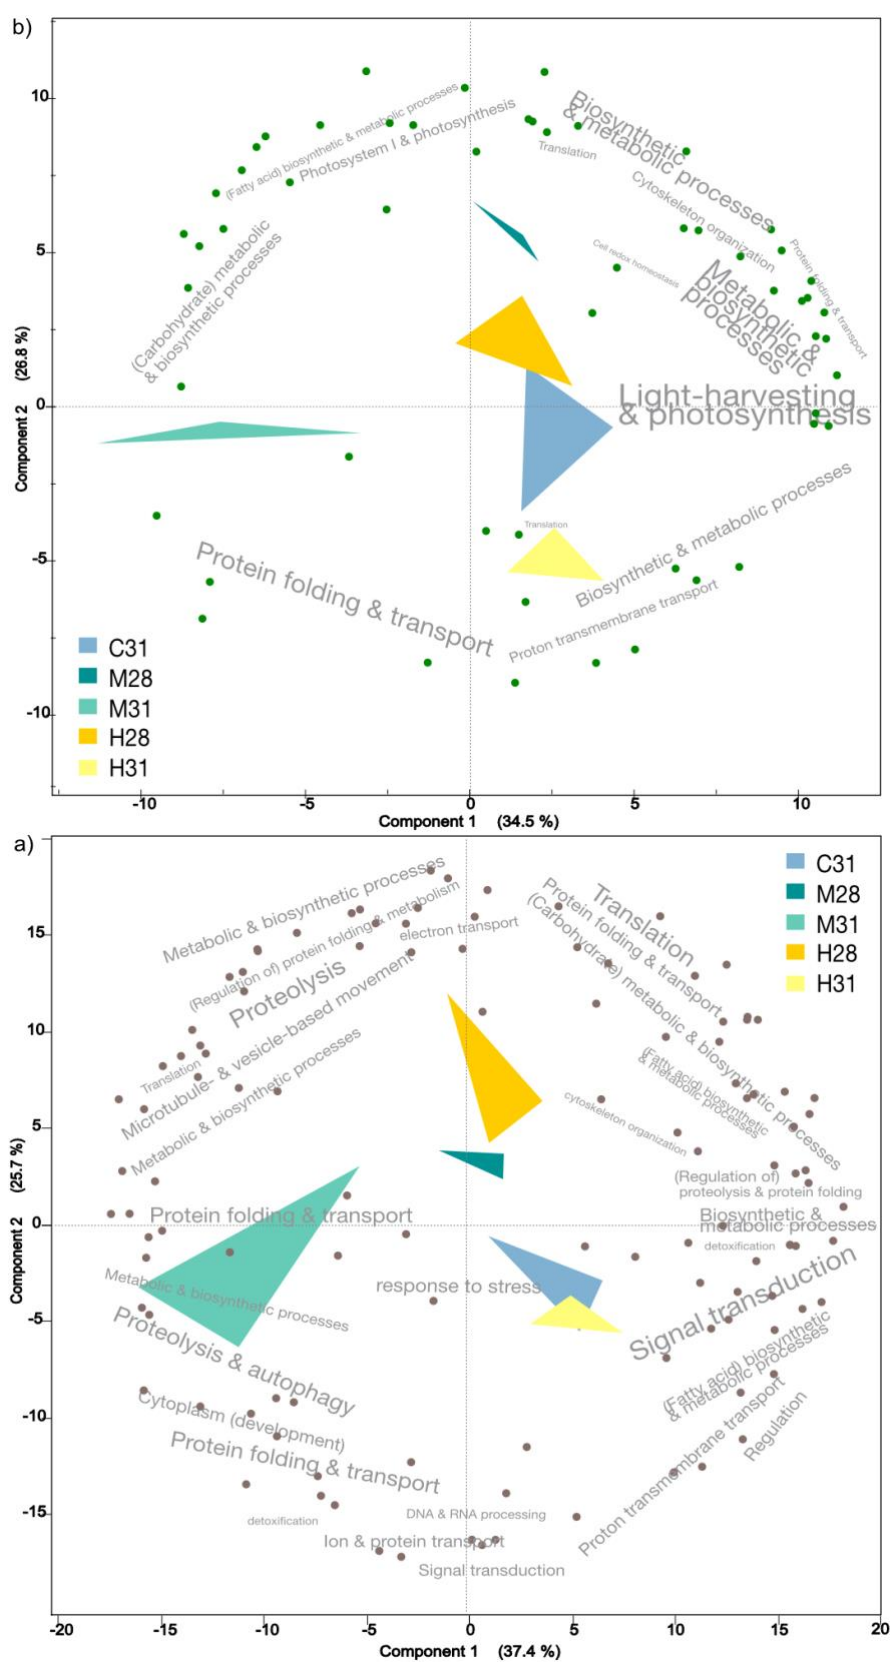

**Figure S5.** Principal component analysis biplot of differentially abundant proteins in (a) photosymbionts and (b) foraminiferal host of *Amphistegina lobifera* in response to treatments of elevated  $p\text{CO}_2$  (C = 492 ppm, M = 963 ppm, H = 3182 ppm) at 28°C or 31°C, indicating associated groups of protein functions or processes. Corners of triangles indicate triplicate samples of the treatments, dots indicate proteins as variables. The respective protein names are given in Figure S6.



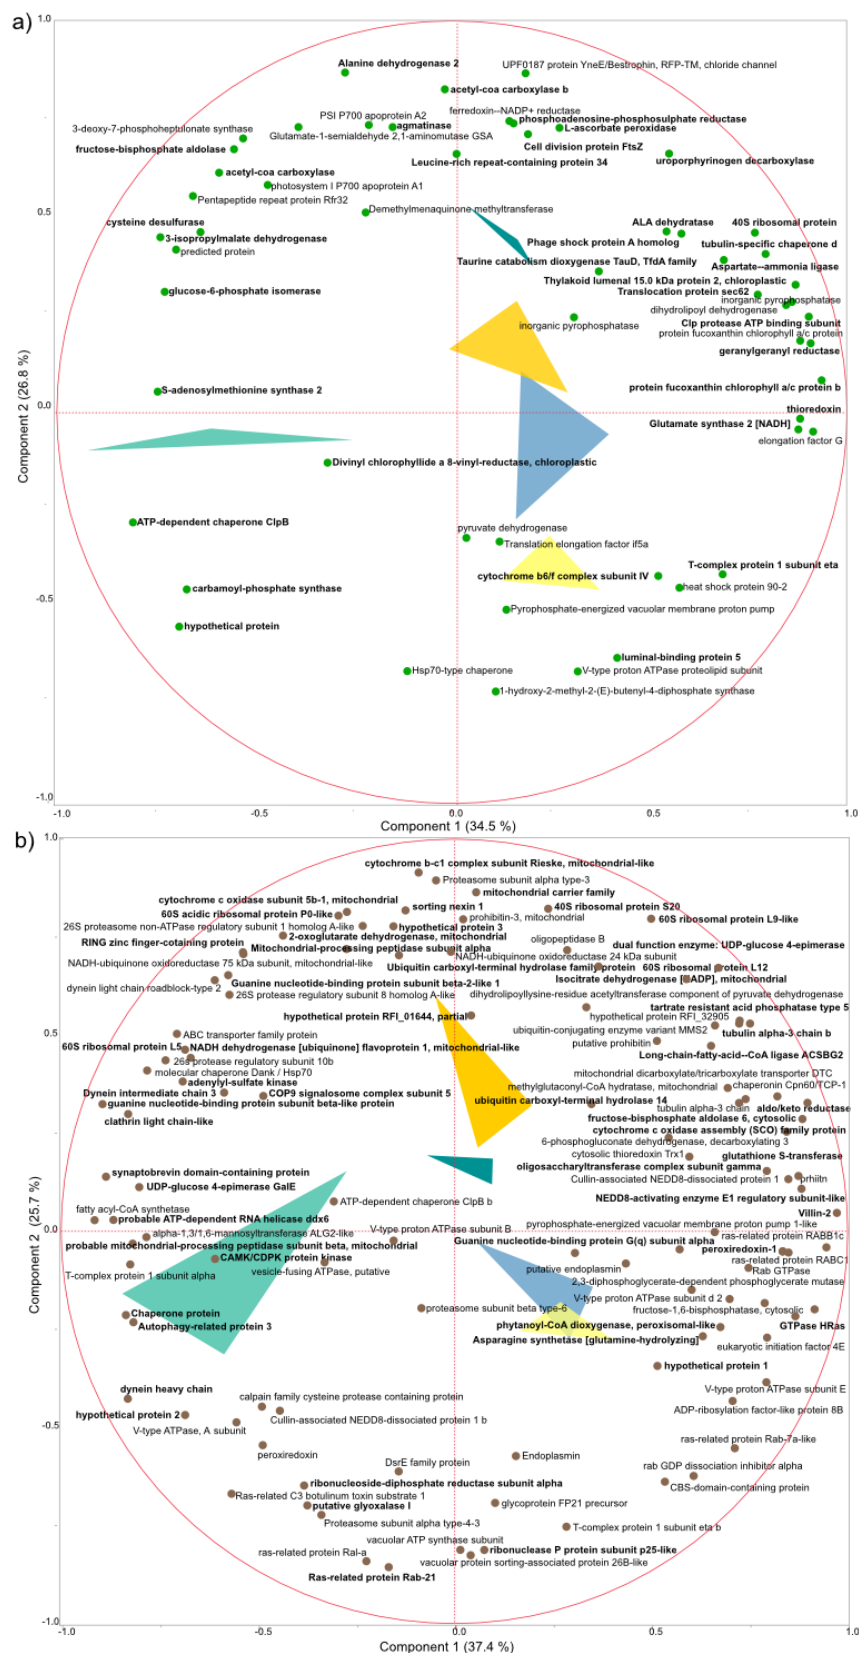

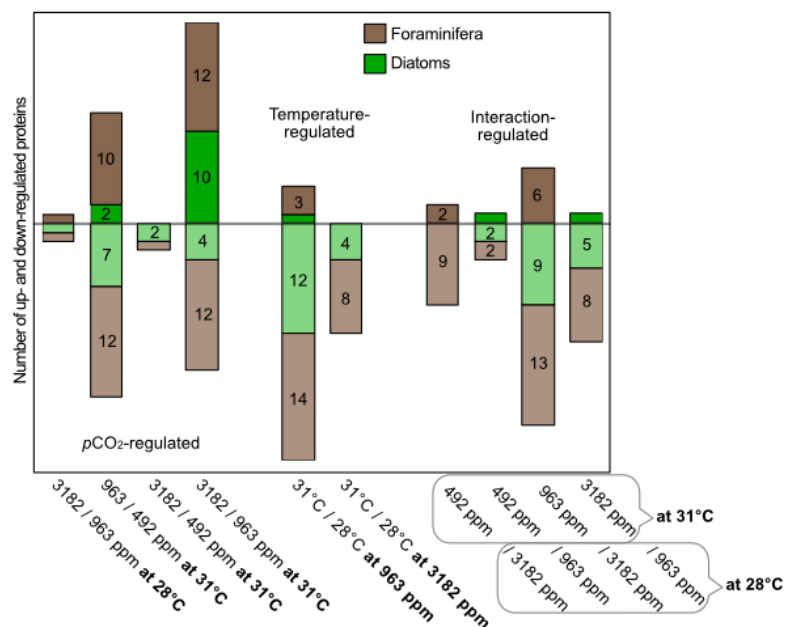

**Figure S7.** Number of regulated proteins (i.e. DAP with Tukeys'  $p \leq 0.05$  and  $\log_2FC \geq |1|$ ) in *A. lobifera* hosts (brown) and symbionts (green), which were either significantly up- or downregulated (Tables 3, 4 and S6), comparing all treatments with each other. Contrasts are shown by groups of main effects of  $pCO_2$ , temperature or both.



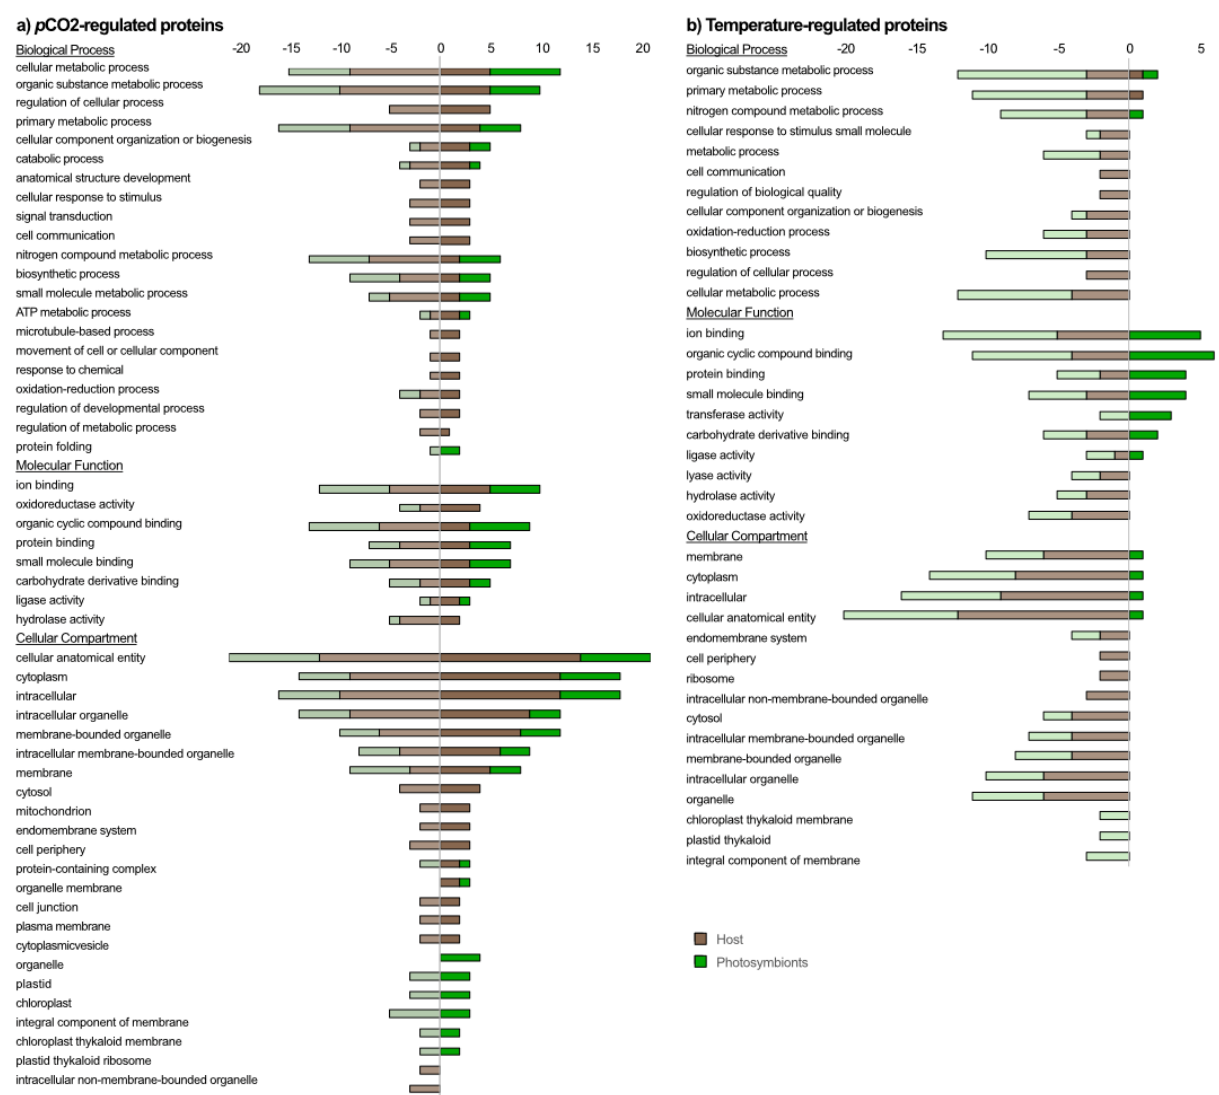

**Figure S8.** Bar plots showing the number of gene ontology term hits of solely (a)  $p\text{CO}_2$ - and (b) temperature-regulated proteins (Figure S7) in *Amphistegina lobifera* host foraminifera (red) and photosymbiotic diatoms (purple) grouped by 3rd level GO terms for biological process, molecular functions and cellular components for selected categories with  $\geq 2$  hits (Tables 3, 4 and S6).

**Table S1.** Additional data for mean chemical conditions with standard deviations of treatments of elevated  $p\text{CO}_2$  (C = 492 ppm, M = 963 ppm, H = 3182 ppm) crossed with 28°C and 31°C over the eight-week experiment. Salinity (Sal) and pH on NBS scale ( $\text{pH}_{\text{NBS}}$ ) in each of the replicate tanks ( $n = 4$ ). Carbonate system parameters (carbonate ion concentration =  $[\text{CO}_3^{2-}]$ , bicarbonate ion concentration =  $[\text{HCO}_3^-]$ , dissolved  $\text{CO}_2$  =  $[\text{CO}_2]_{\text{sw}}$ ) were calculated from weekly measurement of TA, DIC, salinity, and temperature ( $n = 8$ ).

| Treatment | Sal (psu)        | $\text{pH}_{\text{NBS}}$ | $[\text{CO}_3^{2-}]$ ( $\mu\text{M}$ ) | $[\text{HCO}_3^-]$ ( $\mu\text{M}$ ) | $[\text{CO}_2]_{\text{sw}}$ ( $\mu\text{M}$ ) |
|-----------|------------------|--------------------------|----------------------------------------|--------------------------------------|-----------------------------------------------|
| C28       | $35.05 \pm 0.69$ | $8.27 \pm 0.10$          | $340 \pm 72$                           | $2133 \pm 179$                       | $13 \pm 2$                                    |
| C31       | $35.75 \pm 0.73$ | $8.24 \pm 0.08$          | $294 \pm 71$                           | $2042 \pm 231$                       | $12 \pm 1$                                    |
| M28       | $35.54 \pm 0.56$ | $8.04 \pm 0.10$          | $232 \pm 120$                          | $2394 \pm 291$                       | $26 \pm 4$                                    |
| M31       | $35.98 \pm 0.59$ | $8.12 \pm 0.10$          | $262 \pm 39$                           | $2480 \pm 170$                       | $23 \pm 3$                                    |
| H28       | $35.79 \pm 0.52$ | $7.63 \pm 0.11$          | $88 \pm 22$                            | $2703 \pm 426$                       | $80 \pm 21$                                   |
| H31       | $35.76 \pm 0.6$  | $7.69 \pm 0.10$          | $112 \pm 29$                           | $3040 \pm 280$                       | $85 \pm 21$                                   |

**Table S2.** Results of nominal logistic models for the frequencies of test breakage and mortality (empty tests) on *Amphistegina lobifera* exposed to elevated  $p\text{CO}_2$  (C = 492 ppm, M = 963 ppm, H = 3182 ppm) crossed with temperature (T) of 28°C and 31°C for eight weeks. Bold values indicate significant effects ( $p \leq 0.05$ ). Marginally significant variations between (groups of) treatments are indicated in grey ( $0.07 > p\text{-value} > 0.05$ ).

| Parameter | Effect                         | DF | $\chi^2$ | $p\text{-value}$ |
|-----------|--------------------------------|----|----------|------------------|
| Mortality | T                              | 1  | 0.503    | 0.478            |
|           | $p\text{CO}_2$                 | 2  | 0.606    | 0.739            |
|           | $p\text{CO}_2 \times \text{T}$ | 2  | 3.982    | 0.136            |
| Breakage  | T                              | 1  | 0.557    | 0.456            |
|           | $p\text{CO}_2$                 | 2  | 0.988    | 0.610            |
|           | $p\text{CO}_2 \times \text{T}$ | 2  | 5.575    | <b>0.062</b>     |

**Table S3.** Permutational multivariate analysis results for  $\Delta[\text{H}^+]$  between seawater and the test surface of *Amphistegina lobifera* for the fixed effects of  $p\text{CO}_2$  (C = 492 ppm, M = 963 ppm, H = 3182 ppm) and temperature (28°C, 31°C), or light/dark condition (left side), with bold values indicating significant effects ( $p \leq 0.05$ ); and significant adjusted  $p$ -values of pairwise comparison of all  $\Delta[\text{H}^+]$  at and FDR of 0.1.

| Effect                         | DF | MS        | F      | Pr(>F)       | Contrasting treatment combinations |           | $p\text{-adj.}$ |
|--------------------------------|----|-----------|--------|--------------|------------------------------------|-----------|-----------------|
| $p\text{CO}_2$                 | 2  | 5.033e31  | 6.952  | <b>0.003</b> | H31 light                          | M31 dark  | 0.0017          |
| T                              | 1  | 1.339e30  | 0.185  | 0.664        | H31 light                          | C31 dark  | 0.0017          |
| $p\text{CO}_2 \times \text{T}$ | 1  | -5.211e29 | -0.072 | 0.422        | H31 light                          | C28 dark  | 0.0017          |
| Light/dark                     | 1  | 2.82e32   | 5.207  | <b>0.021</b> | H31 light                          | C31 light | 0.0017          |
|                                |    |           |        |              | H31 light                          | M31 light | 0.0066          |
|                                |    |           |        |              | H31 light                          | C28 light | 0.0066          |
|                                |    |           |        |              | H31 light                          | H28 dark  | 0.0066          |
|                                |    |           |        |              | H31 light                          | M28 light | 0.0066          |
|                                |    |           |        |              | H31 light                          | H31 dark  | 0.0117          |
|                                |    |           |        |              | H31 light                          | M28 dark  | 0.0165          |
|                                |    |           |        |              | H31 light                          | H28 light | 0.0618          |
|                                |    |           |        |              | H28 light                          | M31 dark  | 0.0957          |

**Table S4.** Results of two-factorial analysis of variance (ANOVA) of the measured physiological parameters of *Amphistegina lobifera* and its photosymbionts exposed to elevated  $p\text{CO}_2$  (C = 492 ppm, M = 963 ppm, H = 3182 ppm) crossed with temperature (T) of 28°C and 31°C for eight weeks. Bold values indicate significant effects ( $p \leq 0.05$ ). For significant effects, the analysis was followed by Tukeys' HSD post-hoc test for comparison of differences. Respective p-values of significant post-hoc results are given in brackets. Only marginally significant variations between (groups of) treatments are indicated in grey ( $0.07 > p\text{-value} > 0.05$ ).

| Parameter    | Effect                         | DF | MS     | F-ratio | p-value      | post-hoc test summary          |
|--------------|--------------------------------|----|--------|---------|--------------|--------------------------------|
| Chl <i>a</i> | T                              | 1  | 0.017  | 0.630   | 0.438        |                                |
|              | $p\text{CO}_2$                 | 2  | 0.001  | 0.050   | 0.951        |                                |
|              | $p\text{CO}_2 \times \text{T}$ | 2  | 0.000  | 0.015   | 0.985        |                                |
| <i>L</i> *   | T                              | 1  | 3.896  | 0.094   | 0.763        |                                |
|              | $p\text{CO}_2$                 | 2  | 2.443  | 0.059   | 0.943        |                                |
|              | $p\text{CO}_2 \times \text{T}$ | 2  | 49.191 | 1.183   | 0.329        |                                |
| <i>a</i> *   | T                              | 1  | 5.802  | 0.542   | 0.471        |                                |
|              | $p\text{CO}_2$                 | 2  | 4.555  | 0.425   | 0.660        |                                |
|              | $p\text{CO}_2 \times \text{T}$ | 2  | 2.738  | 0.256   | 0.777        |                                |
| <i>b</i> *   | T                              | 1  | 0.683  | 0.096   | 0.760        |                                |
|              | $p\text{CO}_2$                 | 2  | 27.530 | 3.867   | <b>0.040</b> | C > H (0.053)                  |
|              | $p\text{CO}_2 \times \text{T}$ | 2  | 9.043  | 1.270   | 0.305        |                                |
| Growth rate  | T                              | 1  | 0.008  | 5.029   | <b>0.038</b> | 28 > 31 (0.038)                |
|              | $p\text{CO}_2$                 | 2  | 0.002  | 1.200   | 0.324        |                                |
|              | $p\text{CO}_2 \times \text{T}$ | 2  | 0.003  | 1.928   | 0.174        |                                |
| Pore size    | T                              | 1  | 0.951  | 0.375   | 0.542        |                                |
|              | $p\text{CO}_2$                 | 2  | 5.820  | 2.295   | 0.108        |                                |
|              | $p\text{CO}_2 \times \text{T}$ | 2  | 11.396 | 4.493   | <b>0.015</b> | C31 > M31 (0.030), H31 (0.040) |

**Tables S5 and S6** are provided as Excel file in the electronic supplementary materials.

**Table S7.** Number of DAPs in *Amphistegina lobifera* between two treatments of elevated  $p\text{CO}_2$  (C = 492 ppm, M = 963 ppm, H = 3182 ppm) at 28°C and 31°C, without the control treatment C28. Values in the upper right half (white, 193 in total) represent host-associated proteins and values in the lower left half (grey, 97 in total) represent symbiont-associated proteins. Nine DAPs were assigned to both compartments and are indicated as subscript <sup>+</sup> next to photosymbiont DAPs. Respective protein descriptions with annotated gene ontologies are provided in Table S6.

|     | C31             | M28             | M31             | H28            | H31 |
|-----|-----------------|-----------------|-----------------|----------------|-----|
| C31 |                 | 10              | 32              | 17             | 1   |
| M28 | 5 <sup>+</sup>  |                 | 28              | 8              | 15  |
| M31 | 11 <sup>+</sup> | 19 <sup>+</sup> |                 | 30             | 32  |
| H28 | 5 <sup>+</sup>  | 3 <sup>+</sup>  | 11 <sup>+</sup> |                | 20  |
| H31 | 5 <sup>+</sup>  | 14 <sup>+</sup> | 18 <sup>+</sup> | 6 <sup>+</sup> |     |
